# Supplementary material for: Enhanced Membrane Pore Formation through High-Affinity Targeted Antimicrobial Peptides
Source: PLoS One. 2012 Jun 29;7(6):e39768. doi: 10.1371/journal.pone.0039768 (PMC3387250; doi:10.1371/journal.pone.0039768)
Supplement: Table S1 — Minimum inhibitory concentration (MIC, µg/mL) of Nisin(1-12)-peptide derivatives. (DOCX) [file pone.0039768.s004.docx]

**Table S1.** Minimum inhibitory concentration (MIC, µg/mL) of Nisin(1-12)-peptide derivatives.

| Compounda | Vb | N(1-12)**c** | **4** | **1** | **5** | **2** | N(1-12)-**5d** | |
| --- | --- | --- | --- | --- | --- | --- | --- | --- |
| VSEe (15A797) | 0.5 | 128 | 256 | 16 | 128 | 4 | 64 |
| VREf (15A799) | 128 | 128 | 256 | 256 | 64 | 16 | 32 |
| *M. catarhallis* (58L028) | 32 | 256 | 64 | 64 | 8 | 32 | 16 |

acompounds tested in conjunction with compounds reported in ref. [24] bV: vancomycin, values first published in ref. [24], cN(1-12): nisin(1-12)*,d*N(1-12)-**5**:nisin(1-12)-peptide **5** conjugate. *e*VSE: vancomycin susceptible *Enterococci, fVRE:* vancomycin resistant *Enterococci.*
